# Supplementary material for: Electrochemical sensor based on a polyaniline-modified SnO2 nanocomposite for detecting ethephon
Source: Royal Society of Chemistry journal article supplement (doi:10.1039/c5ay01028d), 2015-01-01
Supplement: c5ay01028d1.pdf [file c5ay01028d1.pdf]

## Supporting Information

### **Electrochemical sensor based on polyaniline-modified SnO<sub>2</sub> nanocomposite for ethephon detection**

Zhihong Zhang<sup>a,b\*</sup>, Shuyong Zhai<sup>b</sup>, Minghua Wang<sup>a</sup>, Linghao He<sup>b</sup>, Donglai Peng<sup>b</sup>,  
Shunli Liu<sup>b</sup>, Yanqin Yang<sup>a</sup>, Shaoming Fang<sup>a,b</sup>, Hongzhong Zhang<sup>a,b\*</sup>

<sup>a</sup>Henan Collaborative Innovation Center of Environmental Pollution Control and  
Ecological Resoration,

<sup>b</sup> Henan Provincial Key Laboratory of Surface and Interface Science,

*Zhengzhou University of Light Industry, No. 166, Science Avenue, Zhengzhou 450001,  
P. R. China.*

E-mail addresses: mainzhz@163.com or zhz@zzuli.edu.cn

## 1. EIS Nyquist plots and equivalent circuit

The EIS spectra were analyzed using the software Zview2, a nonlinear least-square was used to fit and determine the parameters of the elements in an equivalent circuit (Fig. S1). The Randles equivalent circuit consisting of solution resistance ( $R_s$ ), charge-transfer resistance ( $R_{ct}$ ), constant-phase element (CPE), and Warburg impedance ( $W_0$ ) was inset of Fig. S1.

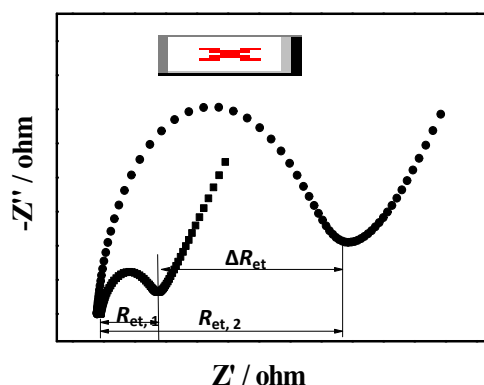

Fig. S1 EIS Nyquist plots and equivalent circuit

## 2. Chemical elements of SnO<sub>2</sub>@PANI and SnO<sub>2</sub>@PANI- ethephon

Table S1 Atomic % in SnO<sub>2</sub>@PANI and SnO<sub>2</sub>@PANI- ethephon

| Samples                        | Atomic % |      |       |       |      |       |
|--------------------------------|----------|------|-------|-------|------|-------|
|                                | C 1s     | N 1s | Sn 2d | O 1s  | P 2p | Cl 2p |
| SnO <sub>2</sub> @PANI         | 60.33    | 9.39 | 6.42  | 23.87 | —    | —     |
| SnO <sub>2</sub> @PANI+ethepho | 43.1     | 6.83 | 5.39  | 35.51 | 8.21 | 1.05  |
| n                              |          |      |       |       |      |       |

## 3. N<sub>2</sub> adsorption /desorption measurements

The N<sub>2</sub> adsorption–desorption isotherms of SnO<sub>2</sub>@PANI sample is presented in Fig. S2. According to the BET analysis, the specific surface area of the composite material was obtained as 14.332 m<sup>2</sup>/g.

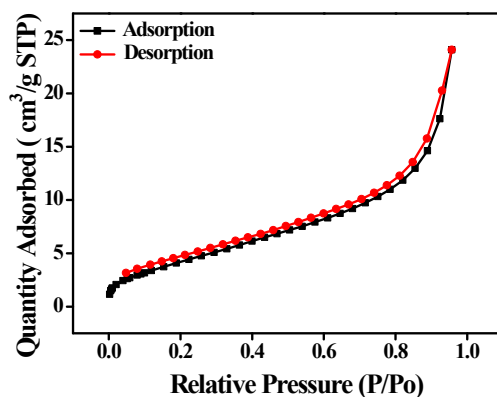

Fig. S2 (a) N<sub>2</sub> adsorption and desorption isotherm of SnO<sub>2</sub>@PANI nanocomposite.

#### 4. Other interferences

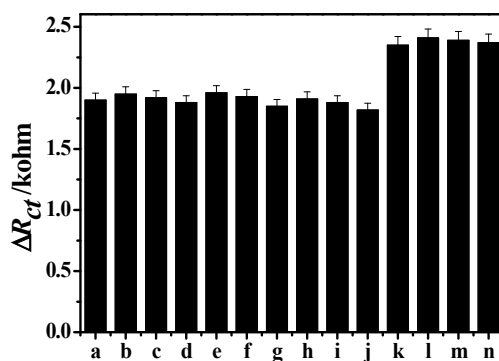

**Fig. S3**  $\Delta R_{ct}$  values for the ethephon detection in the absence (a) and presence of 3 ng/mL of glucose (b), citric acid (c), oxalic acid (d), PO<sub>4</sub><sup>3-</sup> (e), SO<sub>4</sub><sup>2-</sup> (f), NO<sub>3</sub><sup>-</sup> (g), Cu<sup>2+</sup> (h), Fe<sup>3+</sup> (i), Pb<sup>2+</sup> (j), Hg<sup>2+</sup> (k), methyl parathion (l), carbofuran (m), and p-nitrophenol (n).
